# Supplementary material
Source: PubMed Central journal article supplement (PMC3077819)
Supplement: NIHMS264539-supplement-1.pdf [file NIHMS264539-supplement-1.pdf]

**Supplementary Table S1.** Gene validation process using RT-PCR and MSP Analyses in colon cancers

| Analyses |          | Expression (RT-PCR)           | Expression(RT-PCR) and Methylation (MSP)                                              | Methylation (MSP)                      |                                  |                                  |
|----------|----------|-------------------------------|---------------------------------------------------------------------------------------|----------------------------------------|----------------------------------|----------------------------------|
| No.      | Genes    | 1) Expression in Normal Colon | 2) Correlation between gene silencing and DNA methylation in colon cancer cell lines* | 3) Colon Cancer Patient tissues (n=20) | 4) Normal Colon tissues** (n=20) | Others                           |
| 1        | ABCA1    | +                             | YES                                                                                   | 0%                                     |                                  | Excluded (no methylation in CRC) |
| 2        | ALS2CL   | +                             | YES                                                                                   | 0%                                     |                                  | Excluded (no methylation in CRC) |
| 3        | APC2     | +                             | YES                                                                                   | 100%                                   | 0%                               |                                  |
| 4        | ARHGEF4  | +                             | YES                                                                                   | 100%                                   | 55%                              | Excluded (methylation in NC)     |
| 5        | CD109    | +                             | YES                                                                                   | 33%                                    | 0%                               |                                  |
| 6        | CD248    | -                             |                                                                                       |                                        |                                  |                                  |
| 7        | CHD5     | +                             | YES                                                                                   | 10%                                    | 0%                               |                                  |
| 8        | EPHB6    | +                             | YES                                                                                   | 0%                                     |                                  | Excluded (no methylation in CRC) |
| 9        | EVL      | +                             | YES                                                                                   | 60%                                    | 0%                               |                                  |
| 10       | GPNMB    | +                             | YES                                                                                   | 100%                                   | 0%                               |                                  |
| 11       | HDAC4    | +                             | YES                                                                                   | 0%                                     |                                  | Excluded (no methylation in CRC) |
| 12       | ICAM5    | +                             | YES                                                                                   | 5%                                     | 0%                               |                                  |
| 13       | LGR6     | +                             | YES                                                                                   | 15%                                    | 0%                               |                                  |
| 14       | LMO7     | +                             | YES                                                                                   | 100%                                   | 100%                             | Excluded (methylation in NC)     |
| 15       | MAP2     | +                             | YES                                                                                   | 0%                                     |                                  | Excluded (no methylation in CRC) |
| 16       | MKRN3    | +                             | YES                                                                                   | 100%                                   | 100%                             | Excluded (methylation in NC)     |
| 17       | MMP2     | +                             | YES                                                                                   | 95%                                    | 0%                               |                                  |
| 18       | NRCAM    | +                             | YES                                                                                   | 50%                                    | 0%                               |                                  |
| 19       | PCDHB15  | +                             | YES                                                                                   | 100%                                   | 100%                             | Excluded (methylation in NC)     |
| 20       | PTPRD    | +                             | YES                                                                                   | 50%                                    | 0%                               |                                  |
| 21       | RET      | +                             | YES                                                                                   | 11%                                    | 0%                               |                                  |
| 22       | SEMA5B   | +                             | NO                                                                                    |                                        |                                  |                                  |
| 23       | RNF182   | +                             | YES                                                                                   | 0%                                     |                                  | Excluded (no methylation in CRC) |
| 24       | SERPINB1 | +                             | YES                                                                                   | 0%                                     |                                  |                                  |
| 25       | SORL1    | +                             | YES                                                                                   | 0%                                     |                                  | Excluded (no methylation in CRC) |
| 26       | STARD8   | +                             | YES                                                                                   | 55%                                    | 0%                               |                                  |
| 27       | SULF2    | +                             | YES                                                                                   | 0%                                     |                                  | Excluded (no methylation in CRC) |
| 28       | SYNE1    | +                             | YES                                                                                   | 95%                                    | 0%                               |                                  |
| 29       | ZNF432   | +                             | YES                                                                                   | 10%                                    | 5%                               | Excluded (methylation in NC)     |

|    |          |   |     |      |                                  |
|----|----------|---|-----|------|----------------------------------|
| 30 | ZNF442   | + | YES | 0%   | Excluded (no methylation in CRC) |
| 31 | AGC11    | + | NO  |      |                                  |
| 32 | AKAP12   | + | NO  |      |                                  |
| 33 | APC      | + | NO  |      |                                  |
| 34 | ARFGEF2  | + | NO  |      |                                  |
| 35 | BCL11A   | + | NO  |      |                                  |
| 36 | CACNA2D3 | - |     |      |                                  |
| 37 | CENTG1   | - |     |      |                                  |
| 38 | COL7A1   | - |     |      |                                  |
| 39 | CPAMD8   | + | YES | 90%  | 0%                               |
| 40 | CSPP1    | + | NO  |      |                                  |
| 41 | EYA4     | + | YES | 70%  | 0%                               |
| 42 | FBN2     | + | YES | 90%  | 0%                               |
| 43 | FBXW7    | - |     |      |                                  |
| 44 | FLNC     | + | YES | 30%  | 0%                               |
| 45 | FN1      | + | NO  |      |                                  |
| 46 | GAB1     | + | NO  |      |                                  |
| 47 | GNAS     | + | NO  |      |                                  |
| 48 | GRID1    | + | YES | 60%  | 0%                               |
| 49 | GUCY1A2  | + | YES | 50%  | 0%                               |
| 50 | HAPLN1   | + | YES | 10%  | 0%                               |
| 51 | IGFBP3   | + | YES | 25%  | 0%                               |
| 52 | JARID1B  | + | NO  |      |                                  |
| 53 | KALRN    | + | NO  |      |                                  |
| 54 | KIAA0182 | + | NO  |      |                                  |
| 55 | KIAA0664 | - |     |      |                                  |
| 56 | KIAA1632 | + | NO  |      |                                  |
| 57 | KIAA1946 | + | NO  |      |                                  |
| 58 | KRAS1    | + | NO  |      |                                  |
| 59 | LAMA1    | + | YES | 100% | 0%                               |
| 60 | MAPKBP1  | - |     |      |                                  |
| 61 | MYO5C    | + | NO  |      |                                  |
| 62 | NOTCH1   | - |     |      |                                  |
| 63 | NTNG1    | + | YES | 70%  | 0%                               |

|                       |          |    |     |      |    |                                  |
|-----------------------|----------|----|-----|------|----|----------------------------------|
| 64                    | PKNOX1   | +  | NO  |      |    |                                  |
| 65                    | PLCG2    | -  |     |      |    |                                  |
| 66                    | PPM1E    | +  | YES | 55%  | 0% |                                  |
| 67                    | PRKD1    | +  | YES | 20%  | 0% |                                  |
| 68                    | SFRS6    | +  | NO  |      |    |                                  |
| 69                    | SLC22A15 | +  | YES | 5%   | 0% | Excluded (no methylation in CRC) |
| 70                    | SMAD3    | +  | NO  |      |    |                                  |
| 71                    | TCERG1L  | +  | YES | 100% | 0% |                                  |
| 72                    | TDRD6    | +  | YES | 0%   |    | Excluded (no methylation in CRC) |
| 73                    | THBS3    | -  |     |      |    |                                  |
| 74                    | ZNF569   | +  | YES | 40%  | 0% |                                  |
| 75                    | SH3TC1   | +  | YES | 40%  | 0% |                                  |
| <b>Total Gene No.</b> |          | 65 | 45  | 34   | 29 |                                  |

1) '+': indicated that gene is expressed. '-': indicates that gene is not expressed,

2) \* colon cancer cell lines (HCT116, RKO, SW480, and Colo320) were tested for RT-PCR and MSP analyses

3) \*\*Normal colon tissues are cancer-free normal colon tissues

4) Grey color filled genes are 29 genes that cancer-specifically methylated in colon cancer.

**Supplementary Table S2.** Characteristics and clinical information on the initial cohort of colon cancer patients in this study

| Patient # | Sex | Race  | Age  | Cancer Stage | Grade      |
|-----------|-----|-------|------|--------------|------------|
| CR071     | F   | White | 59.3 | Stage 3      | Moderately |
| CR073     | F   | Black | 80.8 | Stage 3      | Moderately |
| CR074     | F   | White | 87.4 | Stage 3      | Moderately |
| CR075     | F   | Black | 66.8 | Stage 3      | High       |
| CR076     | M   | White | 69.6 | Stage 3      | High       |
| CR077     | M   | Black | 45.4 | Stage 3      | Moderately |
| CR078     | M   | White | 56.0 | Stage 3      | High       |
| CR079     | M   | White | 70.6 | Stage 3      | Moderately |
| CR080     | F   | Asian | 48.3 | Stage 3      | High       |
| CR081     | M   | White | 74.8 | Stage 3      | Moderately |
| CR082     | M   | White | 53.1 | Stage 3      | Well       |
| CR083     | M   | White | 47.0 | Stage 3      | Moderately |
| CR084     | F   | White | 65.5 | Stage 3      | High       |
| CR085     | F   | Black | 43.5 | Stage 3      | Moderately |
| CR086     | F   | Black | 45.3 | Stage 2      | Well       |
| CR088     | M   | Black | 62.7 | Stage 3      | Well       |
| CR089     | F   | White | 74.6 | Stage 3      | Well       |
| CR091     | F   | Black | 78.7 | Stage 3      | Well       |
| CR092     | F   | Black | 57.1 | Stage 3      | Well       |
| CR093     | F   | White | 52.2 | Stage 3      | High       |
| CR094     | F   | White | 60.5 | Stage 3      | High       |

**Supplementary Table S3.** Methylation pattern of CAN genes and others in ECM pathway in individual colorectal tumor samples

|    |               | Colon tumor patient samples (CRC) |    |    |    |    |    |    |    |    |    |    |    |    |    |    |    |    |    |    |    |    |  |  |
|----|---------------|-----------------------------------|----|----|----|----|----|----|----|----|----|----|----|----|----|----|----|----|----|----|----|----|--|--|
|    | CAN genes     | 71                                | 73 | 74 | 75 | 76 | 77 | 78 | 79 | 80 | 81 | 82 | 83 | 84 | 85 | 86 | 88 | 89 | 91 | 92 | 93 | 94 |  |  |
| 1  | <b>CD109</b>  | M                                 | U  | U  | U  | M  | M  | U  | M  | M  | U  | U  | U  | U  | U  | U  | U  | U  | U  | M  | U  | M  |  |  |
| 2  | <b>EVL</b>    | U                                 | M  | U  | U  | M  | M  | M  | M  | U  | M  | U  | U  | M  | M  | M  | M  | M  | M  | M  | M  | U  |  |  |
| 3  | <b>GPMB</b>   | M                                 | M  | M  | M  | M  | M  | M  | M  | M  | M  | M  | M  | M  | M  | M  | M  | M  | M  | M  | M  | M  |  |  |
| 4  | <b>ICAM5</b>  | U                                 | U  | U  | U  | U  | U  | U  | U  | U  | U  | U  | U  | M  | U  | U  | U  | U  | M  | U  | U  | M  |  |  |
| 5  | <b>MMP2</b>   | M                                 | M  | M  | M  | M  | M  | M  | M  | M  | M  | U  | M  | M  | M  | M  | M  | M  | M  | M  | M  | M  |  |  |
| 6  | <b>NRCAM</b>  | M                                 | M  | U  | U  | U  | M  | U  | U  | M  | U  | U  | U  | M  | U  | M  | M  | M  | M  | M  | M  | M  |  |  |
| 7  | <b>CPAMD8</b> | M                                 | M  | M  | M  | M  | M  | M  | M  | M  | M  | U  | M  | M  | M  | M  | M  | M  | M  | M  | M  | M  |  |  |
| 8  | <b>FBN2</b>   | M                                 | M  | M  | M  | M  | M  | M  | M  | M  | M  | M  | M  | U  | M  | M  | M  | M  | M  | M  | M  | M  |  |  |
| 9  | <b>FLNC</b>   | M                                 | U  | U  | U  | M  | U  | U  | U  | M  | U  | U  | U  | M  | U  | U  | M  | M  | U  | U  | U  | M  |  |  |
| 10 | <b>HAPLN1</b> | U                                 | U  | U  | U  | U  | U  | U  | U  | U  | U  | U  | U  | M  | U  | U  | U  | U  | U  | U  | U  | U  |  |  |
| 11 | <b>IGFBP3</b> | U                                 | U  | U  | U  | U  | M  | U  | M  | U  | U  | U  | U  | M  | U  | U  | M  | U  | U  | M  | U  | M  |  |  |
| 12 | <b>LAMA1</b>  | M                                 | M  | M  | M  | M  | M  | M  | M  | M  | M  | M  | M  | M  | M  | M  | M  | M  | M  | M  | M  | M  |  |  |
| 13 | <b>NTNG1</b>  | M                                 | U  | U  | U  | M  | M  | U  | M  | M  | M  | M  | M  | M  | U  | M  | M  | M  | M  | M  | M  | M  |  |  |

|   |                    | Colon tumor patient samples (CRC) |    |    |    |    |    |    |    |    |    |    |    |    |    |    |    |    |    |    |    |    |  |  |
|---|--------------------|-----------------------------------|----|----|----|----|----|----|----|----|----|----|----|----|----|----|----|----|----|----|----|----|--|--|
|   | ECM genes          | 71                                | 73 | 74 | 75 | 76 | 77 | 78 | 79 | 80 | 81 | 82 | 83 | 84 | 85 | 86 | 88 | 89 | 91 | 92 | 93 | 94 |  |  |
| 1 | <b>PLAU</b>        | U                                 | M  | U  | M  | M  | M  | M  | M  | M  | M  | M  | M  | U  | M  | M  | M  | M  | M  | M  | M  | M  |  |  |
| 2 | <b>TIMP3</b>       | U                                 | U  | U  | U  | U  | U  | U  | U  | U  | U  | U  | U  | U  | U  | U  | U  | U  | M  | U  | U  | U  |  |  |
| 3 | <b>MMP9</b>        | M                                 | M  | M  | M  | M  | M  | M  | M  | M  | M  | U  | M  | M  | M  | M  | M  | M  | M  | M  | M  | M  |  |  |
| 4 | <b>NID1</b>        | M                                 | M  | M  | M  | U  | M  | M  | M  | M  | M  | M  | M  | M  | M  | M  | M  | M  | M  | M  | M  | M  |  |  |
| 5 | <b>TIMP2</b>       | M                                 | M  | M  | M  | U  | M  | U  | U  | U  | U  | U  | U  | M  | M  | M  | M  | M  | U  | U  | U  | U  |  |  |
| 6 | <b>Osteonectin</b> | U                                 | U  | M  | M  | U  | M  | M  | M  | M  | M  | U  | U  | M  | M  | U  | M  | M  | U  | M  | M  | U  |  |  |

**Supplementary Table S4.** The frequency of aberrant methylation of the genes (*IGFBP3*, *EVL*, *CD109*, *FLNC* and *NRCAM*) and its association with various clinicopathologic findings

|                           | Training Set |          |       |       | Validation Set |          |       |       |
|---------------------------|--------------|----------|-------|-------|----------------|----------|-------|-------|
|                           | IGFBP3 U     | IGFBP3 M | EVL U | EVL M | IGFBP3 U       | IGFBP3 M | EVL U | EVL M |
| <b>N</b>                  | 76           | 69       | 37    | 107   | 24             | 48       | 24    | 48    |
| <b>Median Age (years)</b> | 60.5         | 70.2     | 57    | 69.6  | 65.7           | 70.7     | 68.4  | 74    |
| <b>Location</b>           |              |          |       |       |                |          |       |       |
| Right Colon               | 37           | 41       | 16    | 62    | 22             | 18       | 13    | 27    |
| Left Colon                | 37           | 28       | 21    | 44    | 24             | 8        | 11    | 21    |
| <b>Stage</b>              |              |          |       |       |                |          |       |       |
| Stage I                   | 19           | 17       | 8     | 28    | 10             | 8        | 5     | 13    |
| Stage II                  | 24           | 24       | 12    | 35    | 16             | 11       | 6     | 20    |
| Stage III                 | 21           | 15       | 10    | 26    | 16             | 4        | 11    | 9     |
| Stage IV                  | 12           | 13       | 7     | 18    | 4              | 3        | 1     | 6     |

**Supplementary Table S5. Primers used for MSP and RT-PCR analyses**

| Gene List      | primers      | Sense (5'-3')                       | Antisense (5'-3')                   |
|----------------|--------------|-------------------------------------|-------------------------------------|
| <b>APC</b>     | Unmethy(U)   | GTGTTTTATTGTGGAGTGTGGTT             | CCAATCAACAACTCCCAACAA               |
|                | Methy(M)     | TATTGCGGAGTGC GGGTC                 | TCGACGAACTCCCGACGA                  |
|                | RT1          | GAGACAGAATGGAGGTGCTGC               | GTAAGATGATTGGAATTATCTTCT            |
| <b>CD109</b>   | Unmethy(U)   | GTAGTGGATTGTAGTTTAGGTAGATGTTGTTG    | CACAACAATACACACACAAAAAATAACAACA     |
|                | Methy(M)     | GATTGTAGTTTAGGTAGACGTCGTC           | CGATACACACGCAAAAAAATAAACGACG        |
|                | RT1          | TTGAATCCCAATCCTGGAG                 | TTGTTGCCACTAACCAACAA                |
| <b>CHD5</b>    | Unmethy(U)   | GGGAGGAGTGTGGGTTTTGTG               | CAACAAACAAACAACTCAACAAAAAATAACA     |
|                | Methy(M)     | GAGCGTTCGGGTTTTGC                   | CGACCTCGACGAAAAAATAACG              |
|                | RT1          | GTGGTGC GCGAGGAGGACG                | CTCGATGTTGCCACCAACTCG               |
| <b>CPAMD8</b>  | Unmethy(U)   | AATGAGTGGTGTGGTTTTGTTTGGTTGTTGTTTTG | CAACCTCCTCTATCACCAAAAAATACTCACA     |
|                | Methy(M)     | GCGTTTTGTTTGGTCGTTGTTTTC            | CTCTATCGCCGAAAAATACTCAGC            |
|                | RT1          | CATGGATCTCCACCAGCAAG                | AACCTGGATAAGGCCACCAC                |
|                | RT2          | CACTCAGTGTGAAGGTCCCG                | GAAGGTCTTCAGCAGGGAGG                |
| <b>EVL</b>     | Unmethy(U)   | GTGTGTTTTTTTTGAGGATTTGGAGTTGTTTG    | ACCACCAAAAAATAAAAAACAAAAACAAACCA    |
|                | Methy(M)     | GAGGATTCGGAGTCGTTCC                 | CCGAAAAATAAAAAACGAAAAACGAACCG       |
|                | RT1          | TCGTTGGAGTCAAGTTGCAG                | GAGAACGTGGTTGCCTCTTC                |
| <b>EYA4</b>    | Unmethy(U)-2 | TTTTTTGAGGTTTTGGTGGTTTTATGAGTTTG    | AAATTTTACACAAAAACCAAAAAACCAAAAAACA  |
|                | Methy(M)-2   | TTTTCGGCGGTTTTACGAGTTC              | AAAACCGAAAACGACCGAAAACG             |
|                | RT1          | GAGCCCTTGAACAGCAGTGA                | TGTGTGGATAGGGCTTGGA                 |
|                | RT2          | CTTCTTTTGTGGGGAGGG                  | CAGTTTCTTGCTGATGCGGT                |
| <b>FBN2</b>    | Unmethy(U)-2 | GTTTTGTTGGGTTTTAAAATTTTGTGTTGTG     | AAATAACAACACTACAAAACCAAAACAAAAATACA |
|                | Methy(M)-2   | GGGTTTTAAAATTTTCGCGTCGC             | CTACGAAACCGAACGAAAATACG             |
|                | RT1          | AGGGATCCTTCATTTGCCAC                | GCCCGGGGTATTTACACACT                |
|                | RT2          | CTCAACCTTCGCTTTGTGGA                | ACTCCCAGGGTGTGTAGC                  |
| <b>FLNC</b>    | Unmethy(U)-1 | AGTGAGTTTTGTGGTTGTGTTTTAATAGTGTGTTG | CTAATAACCACTATTATTCATCATACTAACACA   |
|                | Methy(M)-1   | TGGTCGCGTTTTAATAGCGTTC              | TAAATAACCGCTATTATTCATCATACTAACGCG   |
|                | RT1          | GTCATTGCCCTGAGGAGAT                 | TGTCATTGTTGGGAACCACC                |
|                | RT2          | AAGCTGGATGTGCAGTTTGC                | CCACCTTGCTATTAAGGCC                 |
| <b>GPNMB</b>   | Unmethy(U)-1 | AGGTTTGAGATGTGGGTTGTGTTTTG          | CCAAAAACATAAACATTTTCCCAAATCACAATCA  |
|                | Methy(M)-1   | ACGTGGGTCGCGTTTTC                   | TAAACGTTTTCCCGAATCGCAATCG           |
|                | RT1          | CCAGAAATTGGGACGATGTT                | GGGGAGATCTTTGAGGAAGG                |
| <b>GRID1</b>   | Unmethy(U)-1 | TAGTTGTGGGAAGTGTGTTGTTATAGTTGTG     | CCAACCCAACCAACACAATCA               |
|                | Methy(M)-1   | GAAGCGTCGTTGTTATAGTCGC              | CCAACCCAACGCGATCG                   |
|                | RT1          | ATAACACCTCCTGGAACGGG                | TACCGCTTGCTGAAGTCCAC                |
|                | RT2          | GAGTACTCCGAGCCAAGGG                 | GGCGTAGTTCCCCTCTTTG                 |
| <b>GUCY1A2</b> | Unmethy(U)-2 | TTTGATGTGTTAATGTTGTTGTTGTTGTTTTG    | TCCTTCAAACATACTACCAACAAAACACTACAACA |
|                | Methy(M)-2   | TTTAACGTTGTCGTTTGTGCGTTTTC          | AAACATACTACCGACGAAACTACAACG         |
|                | RT1          | CACAGGGAACCTCCAAGTT                 | GGTAGACAGTCGACGACGAGGA              |
|                | RT2          | TGGTGATGTAGCCAGCAAT                 | CTTCAAGGCCATCAGAGCAA                |

|               |              |                                     |                                     |
|---------------|--------------|-------------------------------------|-------------------------------------|
| <b>HAPLN1</b> | Unmethy(U)-2 | GTGGTGGTGGTTTTAAGAAGTTTGTAGTTTTG    | AATTACAACAAAACAAAACCCAATATCACAAAACA |
|               | Methy(M)-2   | GGCGGTTTTAAGAAGTTCGTAGTTTC          | CAAACCCGATATCGCGAAACG               |
|               | RT1          | CGGTGCAAGCTTGTCTCAAT                | GCACTGCAGCCTCAGTAGGA                |
|               | RT2          | GGCTCAGTGATGGCTCTGTG                | ATTGAGACAAGCTTGCACCG                |
|               | RT3          | GCAACAGTTCCACAAGCAC                 | TTTTGGTCAGAAAGGCAGGA                |
| <b>ICAM5</b>  | Unmethy(U)-1 | TTTAGTTTTGTGTTTTGGTTTTGTGTTTTTATTG  | TCCTAACAAAATACCAAAATACAAAAAAATACA   |
|               | Methy(M)-1   | CGTTTCGGTTTTCGTGTTTTTTATC           | CTAACAAAATACCGAAATACGAAAAAAATACG    |
|               | RT1          | GGCGGCCAATGATCAAGGCG                | CGAGTCCTCCAGAGCGCACG                |
| <b>IGFBP3</b> | Unmethy(U)   | GTGTTTGGGTTGTTTAGATGTGAGTATTGTG     | CTACTTAACAACTAAACACACAAAAATAAAACA   |
|               | Methy(M)     | GGTCGTTTAGATGCGAGTATTGC             | TACTTAACAACTAAACGCGCAAAAAATAAAACG   |
|               | RT1          | CAGGGGTGTACACATTCCCA                | TCCTTGGCAGTCTTTTGTGC                |
|               | RT2          | AAAGACAGCCAGCGCTACAA                | TGGGAATGTGTACACCCCTG                |
| <b>LAMA1</b>  | Unmethy(U)   | TGTTTTGGTTATGTGGGTTTTTGTGTTTGTG     | AAACCTAACCTACAAAAACAAACAACATCCA     |
|               | Methy(M)     | CGTGGGTTTTTCGCGTTTGTG               | TAAACCTACAAAAACGAACAACGTCCG         |
|               | RT1          | AGGAACTGGCCAGAGATGCT                | TCTTTGGTTTTGGCTCCCTT                |
|               | RT2          | ACTTTCCGACTGTGTCC                   | CACACGCAGAAGAGGCTGAT                |
| <b>LGR6</b>   | Unmethy(U)   | TGGGTAGGGGTATGTTAGGTG               | CCCTAACTACACACATACCCAAAACTAAACA     |
|               | Methy(M)     | GTAGGGGTACGGTTAGGC                  | GCACGTACCCGAAAACCTAAACG             |
|               | RT1          | TGCCTTATGCCTACCAGTGC                | TGCCTTATGCCTACCAGTGC                |
| <b>MMP2</b>   | Unmethy(U)   | GTGGTTATATGTATTGAGTTAGTGATTTTTGGGTG | AAAAAACAAAACACCCTCAAAAAACCCATAAACA  |
|               | Methy(M)     | TATCGAGTTAGCGATTTTCGGGC             | CGCCCTCAAAAAACCGTAAACG              |
|               | RT1          | GAAAATGGATCCTGGCTTCC                | TGATGCTTCCAAACTTCACG                |
|               | RT2          | ACATCAAGGGCATTGAGGAG                | TGAACCGGTCCTTGAAGAAG                |
| <b>NRCAM</b>  | Unmethy(U)   | TTTGTGGGTTTTGTGGATATGTTGGGTG        | CCAAACAACAATAAAAAACAAAATCAACCTCA    |
|               | Methy(M)     | GTTTTTGCGGATACGTTTGGGC              | CGACTAAAAAACGAAATCGACCTCG           |
|               | RT1          | GACGAAAGCCTCAGAACCAG                | ACATTTGCCACAACCACAGA                |
| <b>NTNG1</b>  | Unmethy(U)   | TTTTTGGGTTTGTTTTTTGTGTTTTTTTTTTG    | CAAACCCCTACTCCAAACAACAACA           |
|               | Methy(M)     | TTTCGGGTTTGTTTTTTGTGTTTTTTTTTTG     | CCTACTCCGAACGAACAACG                |
|               | RT1          | CGGAAGAAGGGAAGTTTGG                 | GATTGCCCATTTGCACAGAAC               |
|               | RT2          | ACGCAATATGGCTTCCCTCT                | TACACTGCACCTTCCCTCGC                |
| <b>PPM1E</b>  | Unmethy(U)-2 | GTGGTGGTAGTTTTGGGGTATTTG            | CCTCCACCTCCTCACAAATAATACA           |
|               | Methy(M)-2   | GCGGTAGTTTCGGGGTATTC                | CCACCTCCTCGCGAATAATACG              |
|               | RT1          | CCCGTTCTGTCTTCAGCAAA                | GATCATGGGGGAACATCTCC                |
|               | RT2          | GGTGCACCAAAGAAAGCAAA                | CTCCCTGTTGAACCCAAT                  |
| <b>PRKD1</b>  | Unmethy(U)-2 | TTTGTGAGGTGGTTTTGAGTTTTGTTATTTG     | ACAACCACAATAACCACAAAATACCCAATCA     |
|               | Methy(M)-2   | GGCGGTTTCGAGTTTCGTTATTC             | CAATAACCGCAAAAATACCCGATCG           |
|               | RT1          | GCCTCAGCTGATCCTTTTCC                | GATGACCCCAACAGACCACA                |
|               | RT2          | GACGCCAACAGAACCATCAG                | ATGAGGATTGGCCCCATTAG                |
| <b>PTPRD</b>  | Unmethy(U)-1 | TTTTGTTTTTGTGTTTGGTTTTGTGTTTTGTTG   | CAATACAACAACCACTACAACAACCTACCA      |
|               | Methy(M)-1   | GTTTCGGTTTTGCGTTTTCGTC              | CGCTACGACAACCTACCG                  |
|               | RT1          | TCAGACAGGGTCTCTGGCG                 | TCTGATCGTAACTGCTTAATACG             |



|                 |                      |                                     |                                     |
|-----------------|----------------------|-------------------------------------|-------------------------------------|
| <b>RET</b>      | Unmethy(U)-1         | TTGGTTTTGTTGGTTTATTTTTGGATTGTTTTG   | CTACACACCCTACTTCAATCACAAAACATAAAACA |
|                 | Methy(M)-1           | GGTTTCGTTTGGTTTATTTTTGGATCGTTTTTC   | CTACTTCGATCGCGAAAACATAAACG          |
|                 | RT1                  | AAGGCGACGTCCGGTGCCG                 | CAGGAGCCTGTAGGCCACG                 |
| <b>SLC22A15</b> | Unmethy(U)-1         | GTGTTTTTGTGTTTTGTTGGTGTTTATTTTTG    | TAAACCCACCAAAAACAAAATAAAAACACTAACA  |
|                 | Methy(M)-1           | GTTTTTCGTTTCGGCGTTTATTTTTC          | CCGAAACGAAAATAAAAACGCTAACG          |
|                 | RT1                  | AGCCATTCCTTGTCCTTGCT                | CAAGCCCAACATTCCTGATG                |
| RT2             | TCCAAGCAAATCTGACCCAA | TGCCCAACCACCATTTAAGA                |                                     |
| <b>TCERG1L</b>  | Unmethy(U)-1         | TTTTTTGGTTGGTTGGTTTTGAGTGAGTTG      | ACAAAACAAAAACACATTACCTACCCATAAAACA  |
|                 | Methy(M)-1           | GGTCGGTTTTCGAGCGAGTC                | AAAACACGTTACCTACCCGTAAAACG          |
|                 | RT1                  | TGCTCTTGCAACCCCTATTG                | TGAGGTGCTAACACCACCGT                |
| RT2             | CACTTCCGAGACATGCTGCT | TTGAGCAGGAGATAGCGTGG                |                                     |
| <b>TDRD6</b>    | Unmethy(U)-3         | TTTTTAATTTTTGGAAGTGGGGGTTGTGTTG     | CACAACACTACCAAAAATCACATCAAATAACAC   |
|                 | Methy(M)-3           | TGGGGGTCGCGTC                       | CTACACCGAAAATCACATCGAAATACACG       |
|                 | RT1                  | TAGTTGACCGAGGCAATTCG                | AAGTTTTTCCCAAAGGCCAA                |
| <b>ZNF569</b>   | Unmethy(U)           | GTTTGTGTAAAATTTAGGTTGAGTTTTTTGTGTG  | CACCCAAACAAAACAACTTCACTATTTACACA    |
|                 | Methy(M)             | TTCGTGTAAAATTTAGGTTGAGTTTTTTGCGC    | CGAACGAAAACAACTTCACTATTTACGCG       |
|                 | RT1                  | GCCTTCTCCCAAAGCTCATC                | ATGGCCTTGCCATATTCACA                |
| <b>BGN</b>      | Unmethy(U)-1         | TTAGTTTTAGTTTTTGTGTTGTTG            | TAAAATAATAAACCATCCACACATC           |
|                 | Methy(M)-1           | TAGTTTTAGTTTTTCGTTTCGTCGT           | ATAATAAACCGTCCGCACGT                |
|                 | RT1                  | TGCCCAGGAGTGAGTAGCTG                | CGAAGCTTCCTCATCGTTCA                |
| RT2             | AACCTGTACTGTCCCGGAGG | TGGACCAGAAGGATAAGGGG                |                                     |
| <b>SH3TC1</b>   | Unmethy(U)-2         | TTGTTTAGGAAAGAGTTAATGATTAATTGGTTGTG | TACTTCCTCCCTACACCTAAAAACCAATAACA    |
|                 | Methy(M)-2           | CGTTTAGGAAAGAGTTAATGATTAATCGGTTGC   | CCTACGCCTAAAAACCGATAACG             |
|                 | RT1                  | ACCTCATCGAGATCCTTGGG                | GGCATCCTCCTCAGAAAAGC                |
| RT2             | TGCTCTCGGCTTCACTCATC | GGTGGTCAGGACACAGGACA                |                                     |

---

**Supplementary Table S6.** Multivariate cox proportional regression of methylation status of 5 genes adjusted for age in CRC stage 2 (n=76).

| Gene                        | Stage II CRC (Training + Validation Cohorts) |            |         |
|-----------------------------|----------------------------------------------|------------|---------|
|                             | HR                                           | 95%CI      | p value |
| <i>IGFBP3</i>               | 3.02                                         | 1.42-6.40  | 0.004   |
| <i>EVL</i>                  | 1.45                                         | 0.55-3.78  | 0.453   |
| <i>CD109</i>                | 2.41                                         | 1.14-5.10  | 0.021   |
| <i>NRCAM</i>                | 1.29                                         | 0.61-2.75  | 0.505   |
| <i>FLNC</i>                 | 0.90                                         | 0.43-1.86  | 0.774   |
| <i>IGFBP3 + EVL</i>         | 2.30                                         | 0.70-7.61  | 0.172   |
| <i>IGFBP3 + CD109</i>       | 5.85                                         | 2.03-16.83 | 0.001   |
| <i>EVL + CD109</i>          | 2.50                                         | 0.71-8.83  | 0.153   |
| <i>IGFBP3 + EVL + CD109</i> | 4.82                                         | 0.90-25.68 | 0.066   |

## **Supplementary Materials and Methods**

### **Quantitative Methylation-Specific PCR (MSP) using real-time PCR**

Sodium bisulfite modification, which converts unmethylated cytosine residues to uracil residues, was carried out on 1ug genomic DNA isolated from the paraffin-embedded tissue sections with the use of an EZ DNA methylation kit (Zymo Research Co) according to the manufacturer's instructions. NDRG4 methylation-specific PCR analysis was performed on bisulfite-modified DNA as described in detail elsewhere (20,21).

For quantitative real-time analyses, the Power SYBR Green PCR kit (Applied Biosystems) was used and the amplification conditions consisted of an initial 10-min denaturation step at 95 °C, followed by 40 cycles of denaturation at 95 °C for 15 s and annealing and extension for 30 s and 60 s, respectively. A ABI StepOnePlusReal-Time PCR System was used (Applied Biosystems), and for quantitation the comparative cycle threshold (Ct) method was used, normalizing the Ct values for the indicated gene to the Ct values of Unmethylated reaction relative to a methylated reaction sample.

**Supplementary Figure S1. Yi et al.**

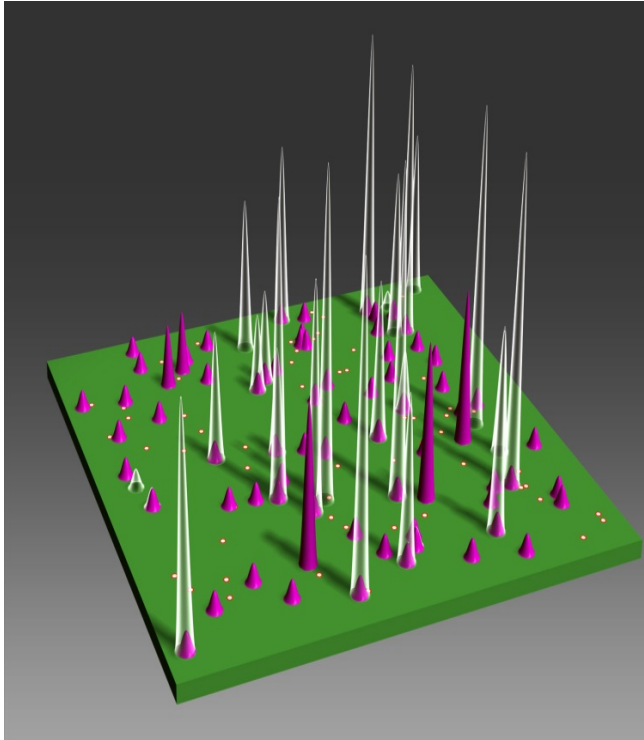

| Colon Cancer |                 |           |                |
|--------------|-----------------|-----------|----------------|
| No.          | Genes           | Mutation* | Methylation*** |
| 1            | <i>HAPLN1</i>   | 5.7%      | 10.0%          |
| 2            | <i>SLC22A15</i> | 5.7%      | 5.0%           |
| 3            | <i>ICAM5</i>    | < 5% *    | 5.0%           |
| 4            | <i>CHD5</i>     | < 5%      | 10.0%          |
| 5            | <i>RET</i>      | 8.6%      | 10.5%          |
| 6            | <i>LGR6</i>     | 7.1%      | 15.0%          |
| 7            | <i>PRKD1</i>    | 5.7%      | 20.0%          |
| 8            | <i>IGFBP3</i>   | 5.7%      | 25.0%          |
| 9            | <i>FLNC</i>     | 5.7%      | 30.0%          |
| 10           | <i>CD109</i>    | 5.7%      | 33.3%          |
| 11           | <i>ZNF569</i>   | < 5%      | 40.0%          |
| 12           | <i>SH3TC1</i>   | 5.7%      | 40.0%          |
| 13           | <i>GUCY1A2</i>  | 8.6%      | 50.0%          |
| 14           | <i>NRCAM</i>    | < 5%      | 50.0%          |
| 15           | <i>PTPRD</i>    | 7.1%      | 50.0%          |
| 16           | <i>PPM1E</i>    | < 5%      | 55.0%          |
| 17           | <i>STARD8</i>   | < 5%      | 55.0%          |
| 18           | <i>GRID1</i>    | 5.7%      | 60.0%          |
| 19           | <i>EVL</i>      | 5.7%      | 60.0%          |
| 20           | <i>EYA4</i>     | 5.7%      | 70.0%          |
| 21           | <i>NTNG1</i>    | 5.7%      | 70.0%          |
| 22           | <i>CPAMD8</i>   | 5.7%      | 90.0%          |
| 23           | <i>FBN2</i>     | 11.4%     | 90.0%          |
| 24           | <i>MMP2</i>     | 8.6%      | 95.0%          |
| 25           | <i>SYNE1</i>    | 14.3%     | 95.0%          |
| 26           | <i>LAMA1</i>    | 11.4%     | 100.0%         |
| 27           | <i>TCERG1L</i>  | 5.7%      | 100.0%         |
| 28           | <i>APC2</i>     | < 5%      | 100.0%         |
| 29           | <i>GPNMB</i>    | < 5%      | 100.0%         |

**Supplementary Figure S1.** (Left) Mutated genes are plotted in two-dimensional space representing chromosomal positions of CAN genes (purple). 29 hypermethylated genes are plotted with CAN genes (Wood et al., 2007). Transparent peaks correspond to hypermethylated genes and peak heights reflect DNA methylation frequency in colon primary cancers. (Right) Table display the mutation and methylation rates. Mutation rate was adopted from Wood et al., 2007. \* and \*\* indicate mutation score and mutation score was less than 5% rate, respectively. \*\*\* indicates methylation frequency of genes in CRC patient samples (n=20)

**Supplementary Figure S2. Yi et al.**

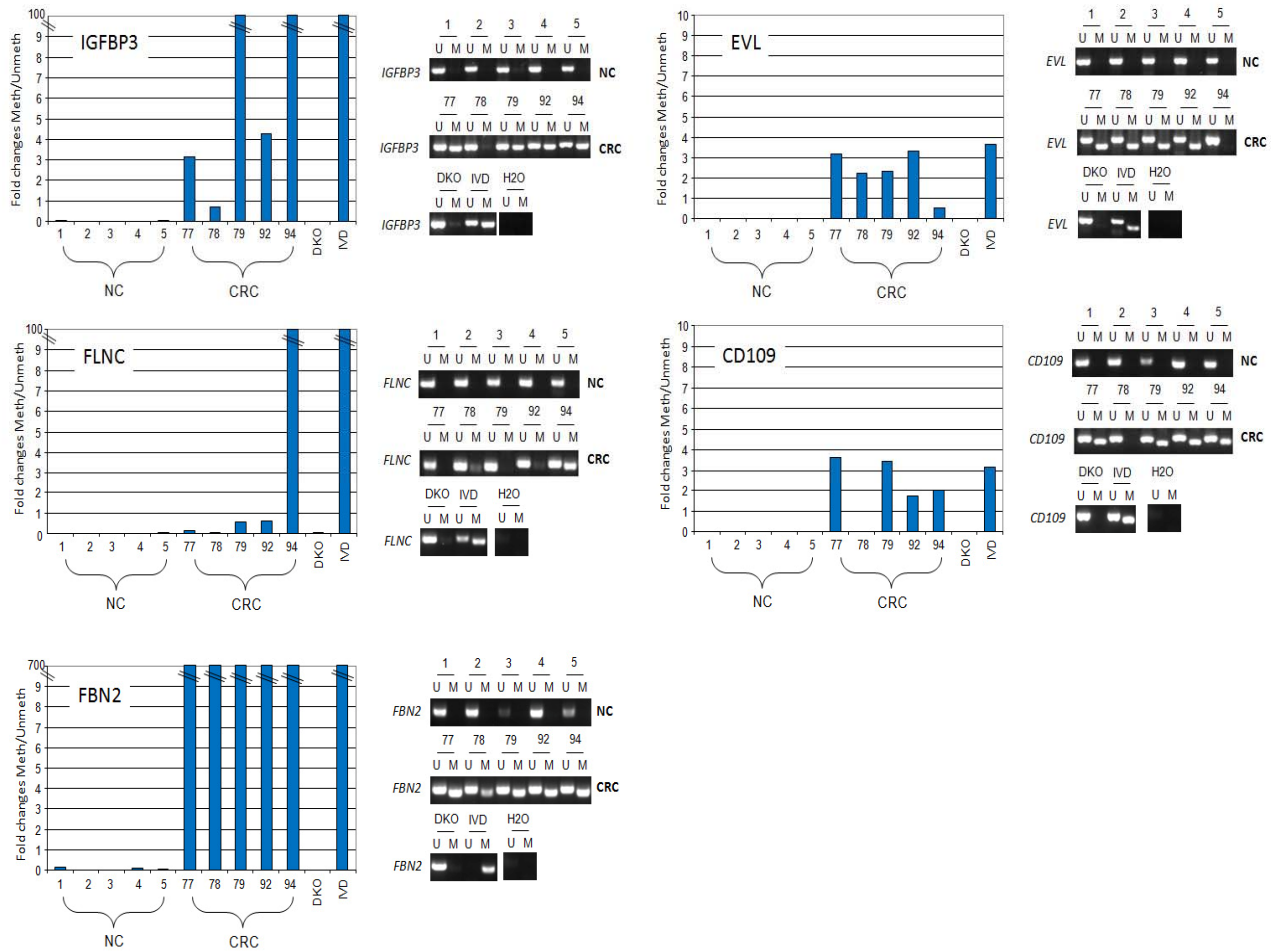

**Supplementary Figure S2.** Quantitative MSP analysis with representative genes (*IGFBP3*, *EVL*, *FLNC*, *CD109*, and *FBN2*) using real-time PCR. NC (1, 2, 3, 4, and 5) and CRC (77, 78, 79, 92, and 94) indicate normal colon and colorectal cancer, respectively. Left graphical panel shows MSP using real time PCR and right sided panel shows the gel based showed MSP analysis for the same samples. Real-time MSP is shown as fold change for Methylated signal relative to Unmethylated signal. In MSP analysis (right panel), signals for unmethylated (U) and methylated (M) DNA are shown for each sample.

**Supplementary Figure S3. Yi et al.**

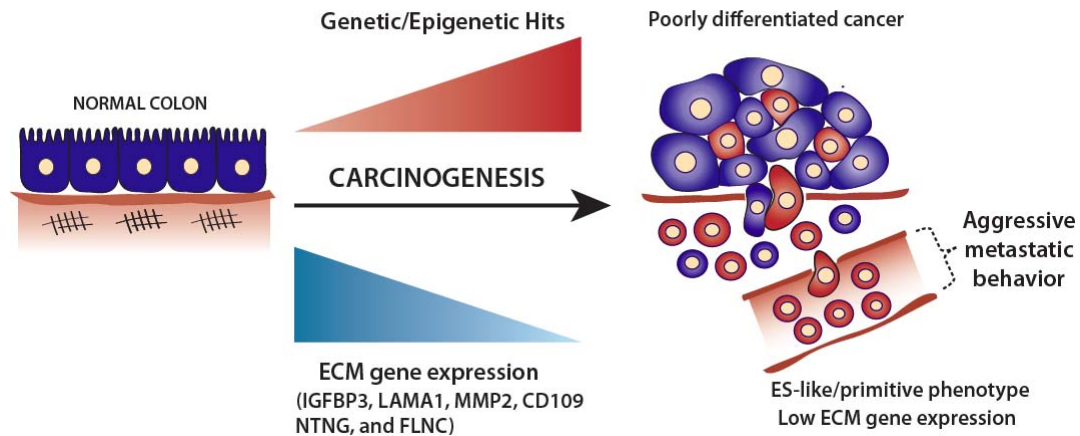

**Supplementary Figure S3.** A proposed model showing disruption of the ECM pathway in invasive CRC associated with aggressive behavior. Normal colonic epithelium is depicted on the left as uniform blue cells on an intact basement membrane (pink with track marks). The polarity of the cells and the integrity of the membrane reflect normal ECM regulation by the epithelial and underlying mesenchymal cells. During the process of epithelial cell transformation, there are increasing genetic and epigenetic alterations in the ECM genes as discussed in the text. This loss of function helps generate an invasive cancer (blue and red cells on the right). Cells with the most profound dysregulation of the ECM pathway associated with an epithelial-mesenchymal transition, loss of polarity, loss of cell-cell adhesion properties, and ability to enter the vascular space are shown (red cells on the bottom right). These features characterize CRC with an ESC-like state and the greatest potential for invasion into the lymphovascular space and establishing eventual distant metastases.
